# Supplementary material for: Fabrication of a donkey spleen ferritin–pectin complex to reduce iron release and enhance the iron supplementation efficacy
Source: Royal Society of Chemistry journal article supplement (doi:10.1039/d2fo01338j), 2022-01-01
Supplement: d2fo01338j1.pdf [file d2fo01338j1.pdf]

# **Fabrication of donkey spleen ferritin-pectin complex to reduce iron release and enhance iron supplementation efficacy**

Mingyang Sun<sup>1</sup>, Jing Gan<sup>2</sup>, Yuehuan Li, Shuhan Dai, Chenyan Lv<sup>1\*</sup>, Guanghua Zhao<sup>1</sup>

<sup>1</sup>College of Food Science & Nutritional Engineering, China Agricultural University,  
Beijing Key Laboratory of Functional Food from Plant Resources, Beijing 100083,  
China.

<sup>2</sup>College of Life Science, Yantai University, Yantai, Shandong 264000, China.

Corresponding Author:

Chenyan Lv, PhD

No. 17 Qing Hua East Road, Haidian District, Beijing, P. R. China

E-mail: [2019023@cau.edu.cn](mailto:2019023@cau.edu.cn)

**A**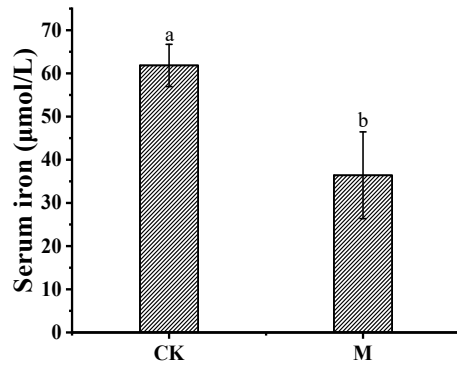**B**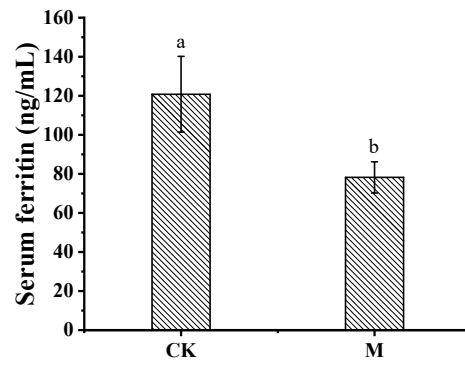

Fig. S1. The concentration of (A) serum iron and (B) serum ferritin in CK, control check, and M, model group at fourth week. Values are means  $\pm$  SD, different letters in the column indicate significant differences ( $P < 0.05$ ) between treatments.
